# Supplementary material
Source: PubMed Central journal article supplement (PMC4505680)
Supplement: JVI.00783-15_zjv999090606so1.pdf [file JVI.00783-15_zjv999090606so1.pdf]

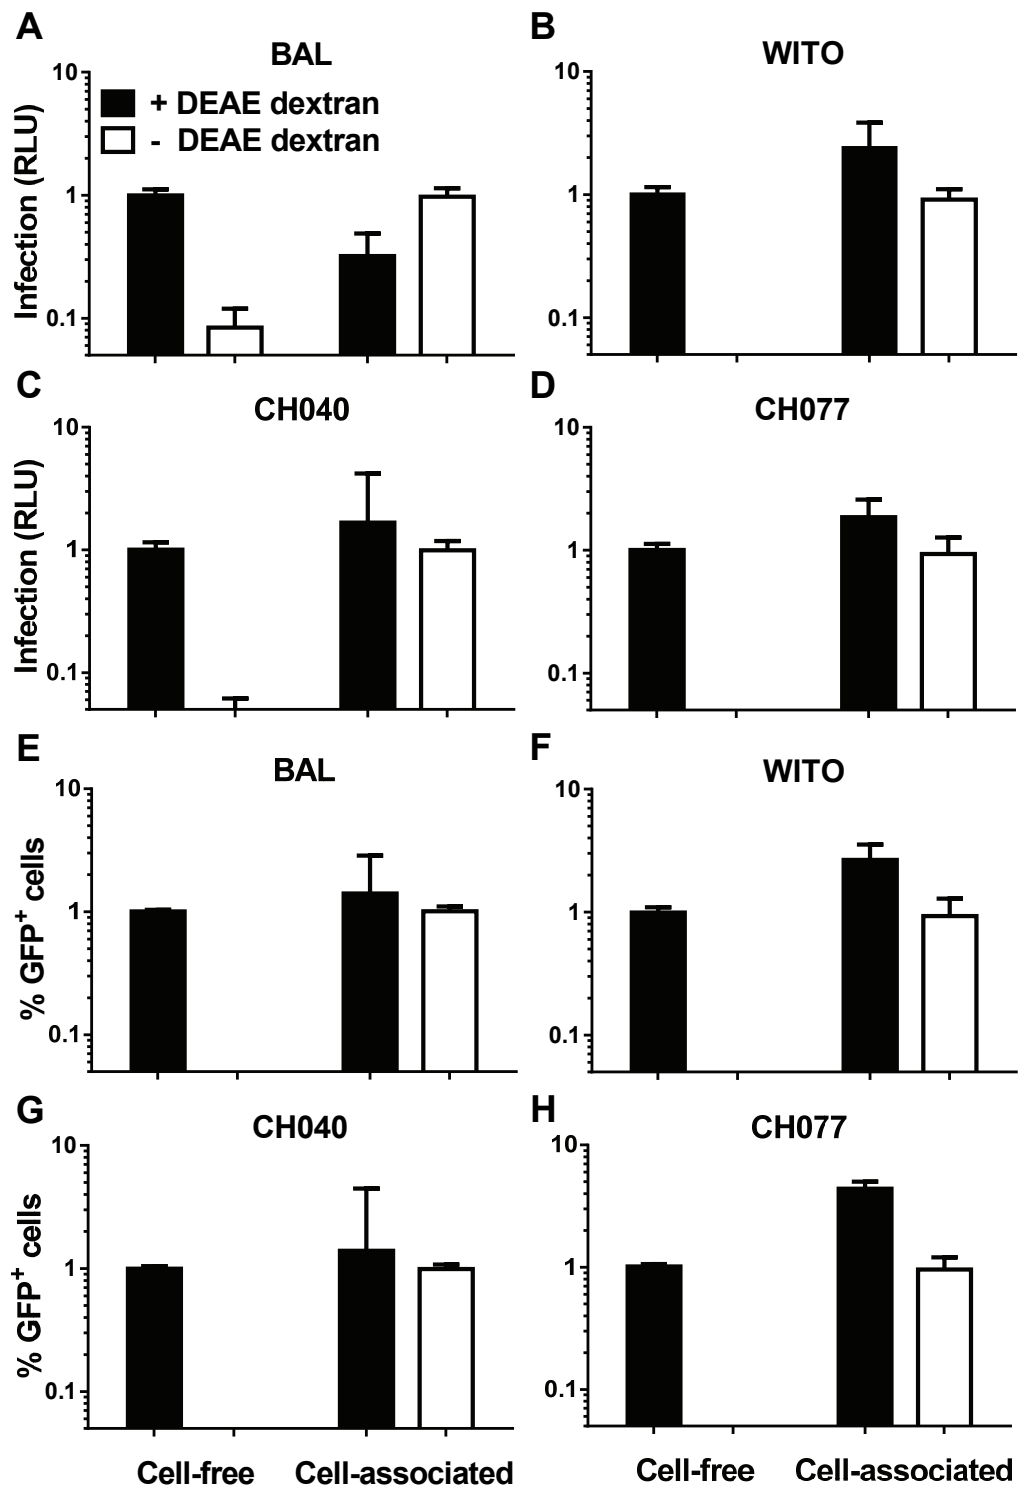

**Figure S1: Infection with cell-free or cell-associated virus  $\pm$  DEAE-dextran (10 $\mu$ g/mL).** The HIV-1 Env variants, BAL, WITO, CH040 and CH077, were tested on TZM-bl (A-D) or A3R5 (E-H) target cells with and without DEAE-dextran added to the media. Results are summarized as infection based on relative luminescence units (RLU) (A-D) or percentage of GFP<sup>+</sup> (Far Red<sup>-</sup>) cells (E-H). Data are normalized to the mean of the positive control wells with (cell-free) and without (cell-associated) DEAE-dextran and expressed as median  $\pm$  IQR, where 1 is equal to 100 percent infection.

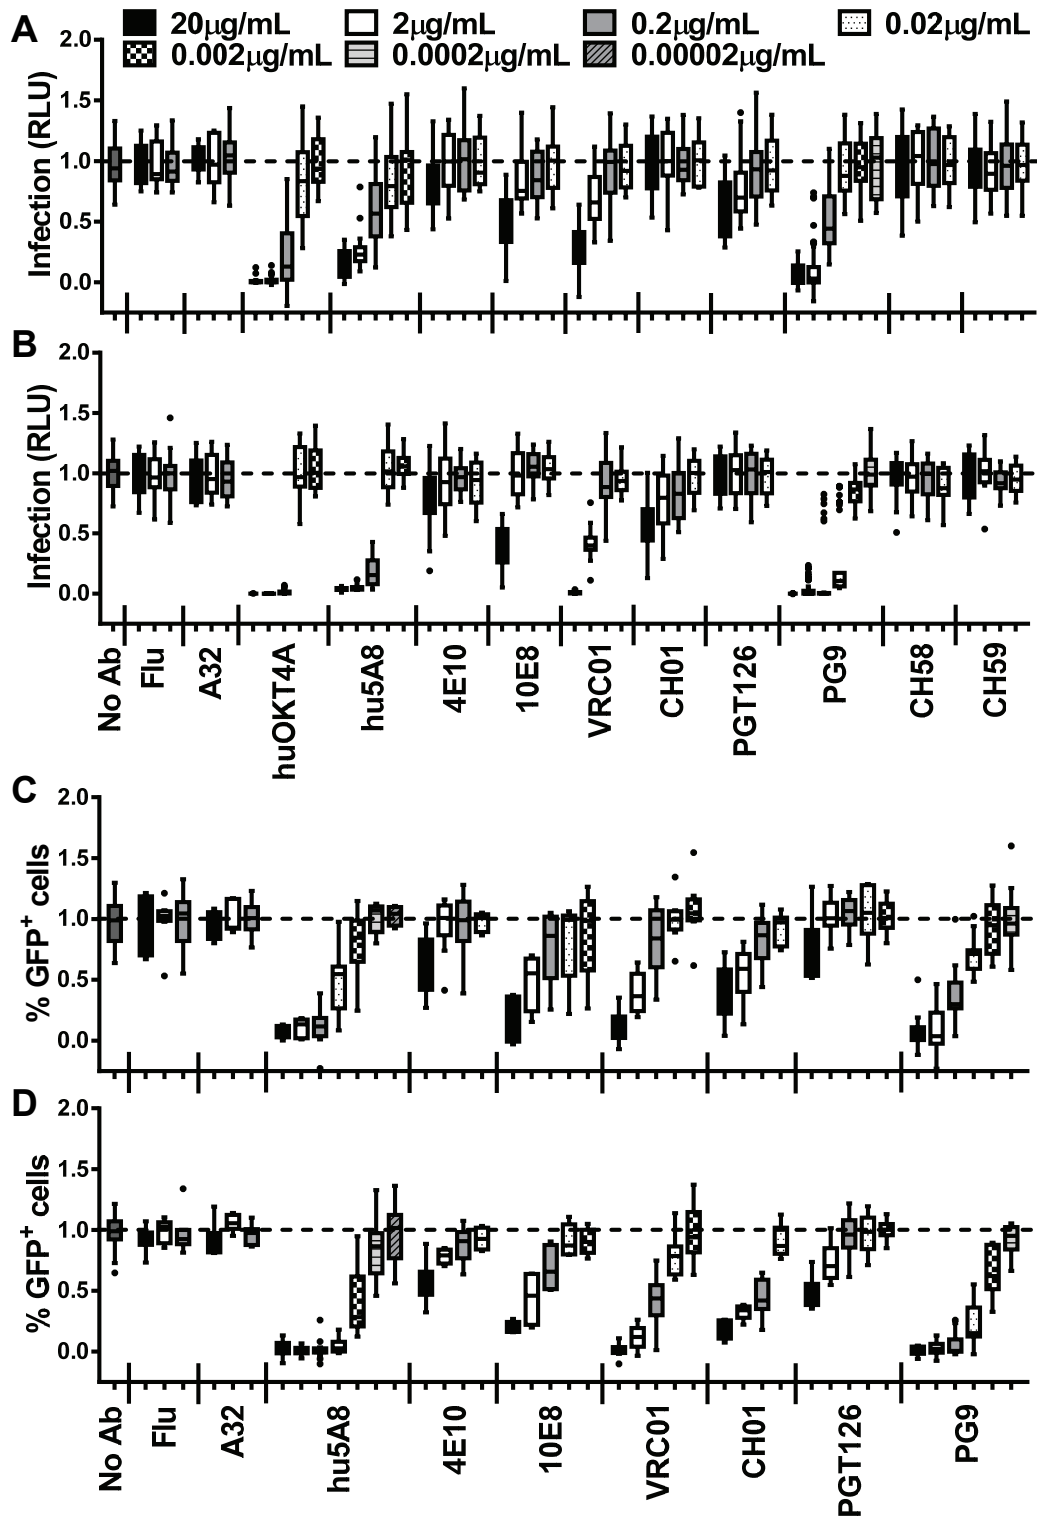

**Figure S2A: Infection with cell-associated or cell-free WITO ± DEAE-dextran with different antibodies.** TZM-bl (A,B) or A3R5 (C,D) target cells were infected by cell-associated (A,C) or cell-free (B,D) WITO virus in the presence of different concentrations (20-0.00002 µg/mL) of antibodies including anti-Flu, A32, 4E10, 10E8, VRC01, CH01, PGT126, PG9, CH58, CH59, and the CD4-directed antibodies hu5A8 and huOKT4A. Background (negative control) was subtracted from results, and results were normalized to the no antibody positive control and summarized as infection based on RLU (A,B) or percentage of GFP<sup>+</sup> (Far Red<sup>-</sup>) cells (C,D) where 1 is equal to 100 percent infection. Results are expressed as box-and-whisker plots illustrating the median, first and third quartiles, and range with outliers (circles).

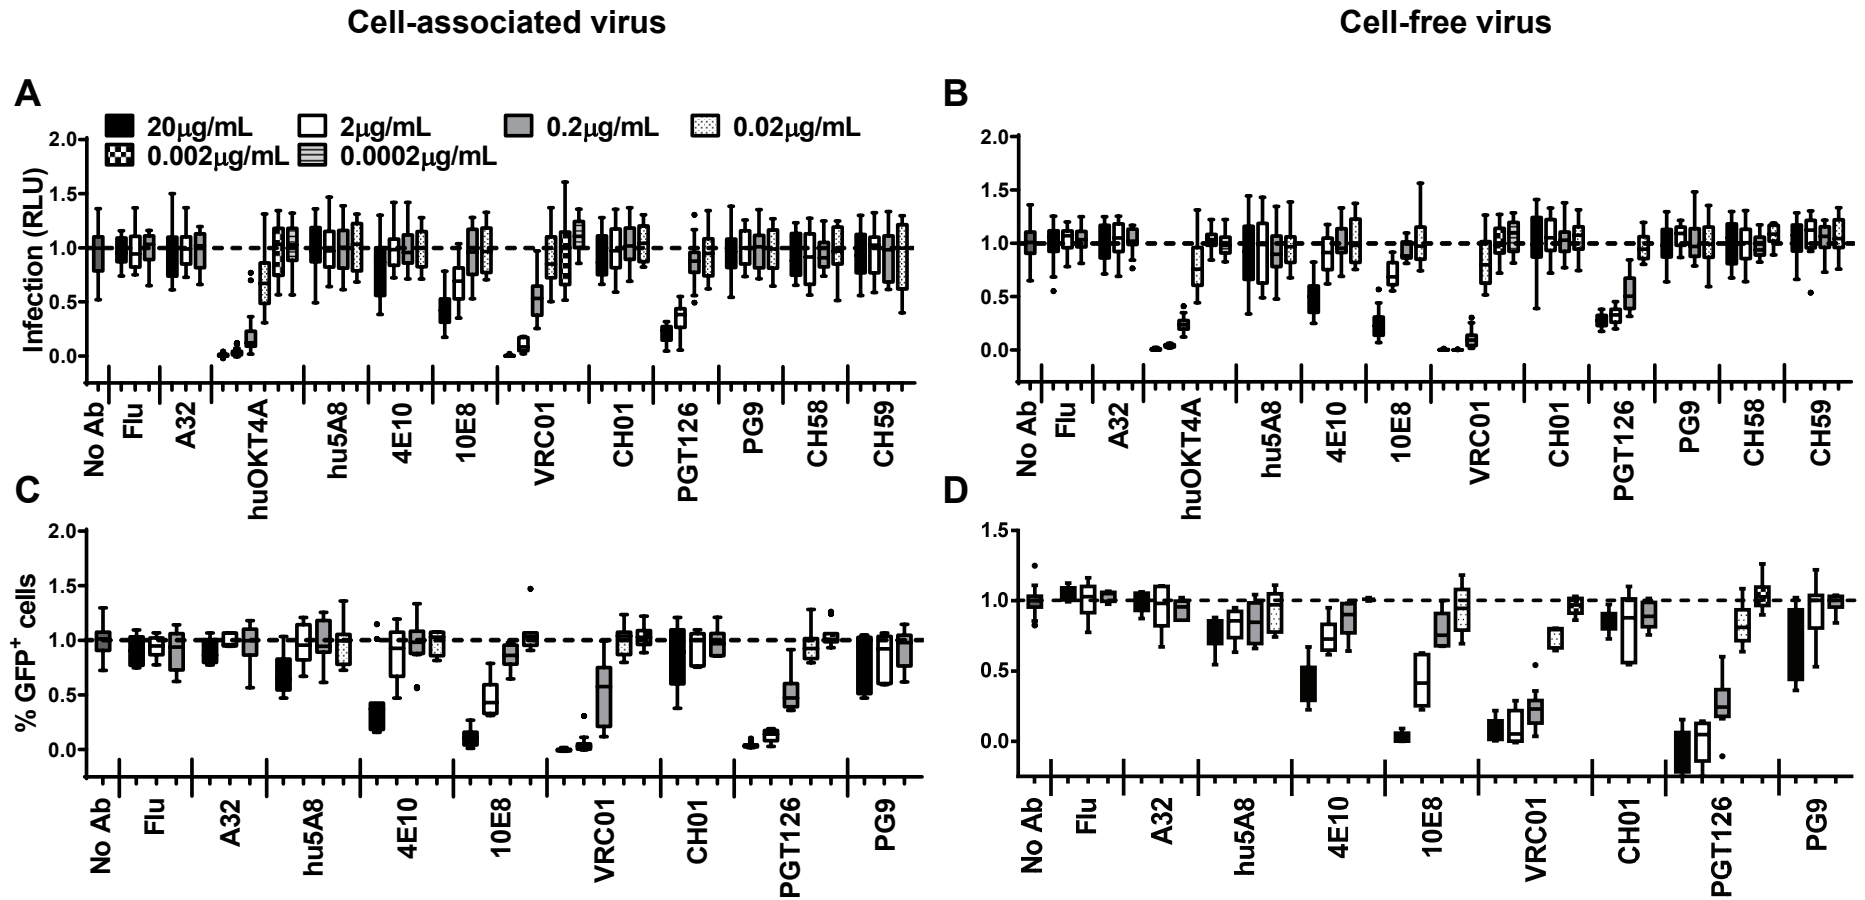

**Figure S2B: Infection with cell-associated or cell-free virus ± DEAE-dextran (10µg/mL) with different antibodies.** Infection of TZM-bl (A,B) or A3R5 (C,D) target cells by cell-associated (A,C) or cell-free (B,D) BAL virus was carried out in the presence of different concentrations (20-0.0002µg/mL) of antibodies including anti-Flu, A32, 4E10, 10E8, VRC01, CH01, PGT126, PG9, CH58, CH59, and the CD4-directed antibodies hu5A8 and huOKT4A. Background was subtracted, and results were normalized to the no antibody positive control and summarized as infection based on quantification of RLU (A,B) or percentage of GFP<sup>+</sup> (Far Red<sup>+</sup>) cells (C,D). Results are expressed as box-and-whisker plots illustrating the median, first and third quartiles, and range with outliers (circles).

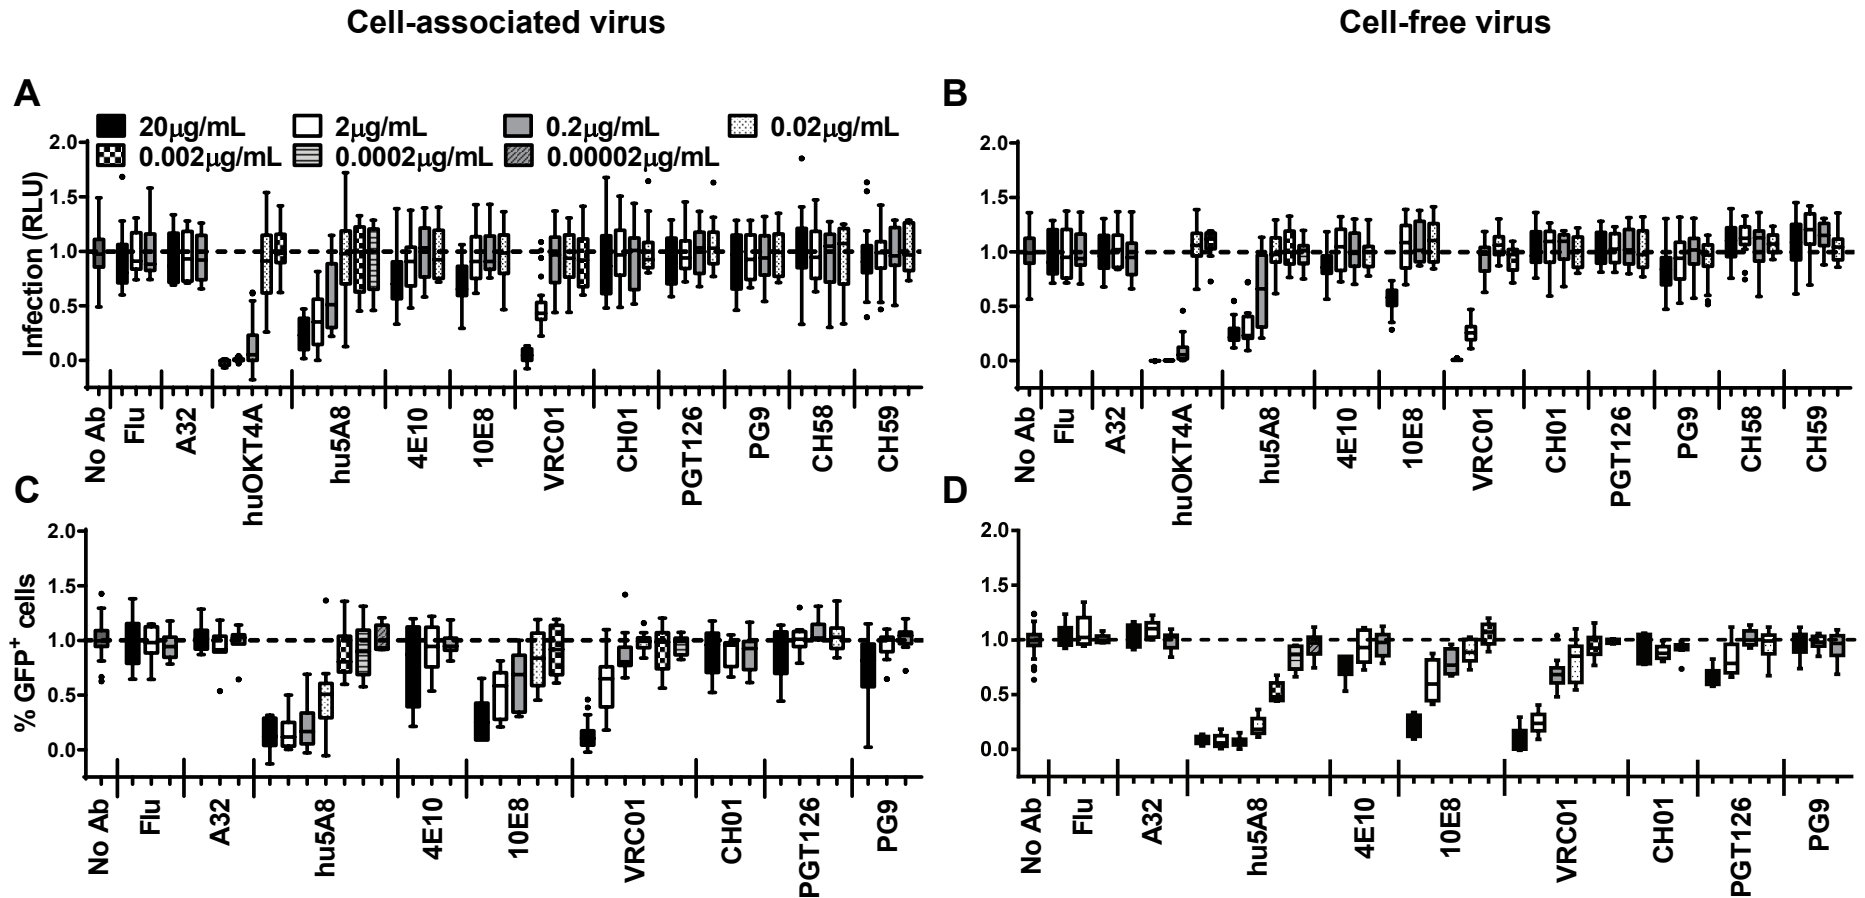

**Figure S2C: Infection with cell-associated or cell-free virus ± DEAE-dextran (10µg/mL) with different antibodies.** Infection of TZM-bl (**A,B**) or A3R5 (**C,D**) target cells by cell-associated (**A,C**) or cell-free (**B,D**) CH040 virus was carried out in the presence of different concentrations (20-0.00002µg/mL) of antibodies including anti-Flu, A32, 4E10, 10E8, VRC01, CH01, PGT126, PG9, CH58, CH59, and the CD4-directed antibodies hu5A8 and huOKT4A. Background was subtracted, and results were normalized to the no antibody positive control and summarized as infection based on quantification of RLU (**A,B**) or percentage of GFP<sup>+</sup> (Far Red<sup>-</sup>) cells (**C,D**). Results are expressed as box-and-whisker plots illustrating the median, first and third quartiles, and range with outliers (circles).

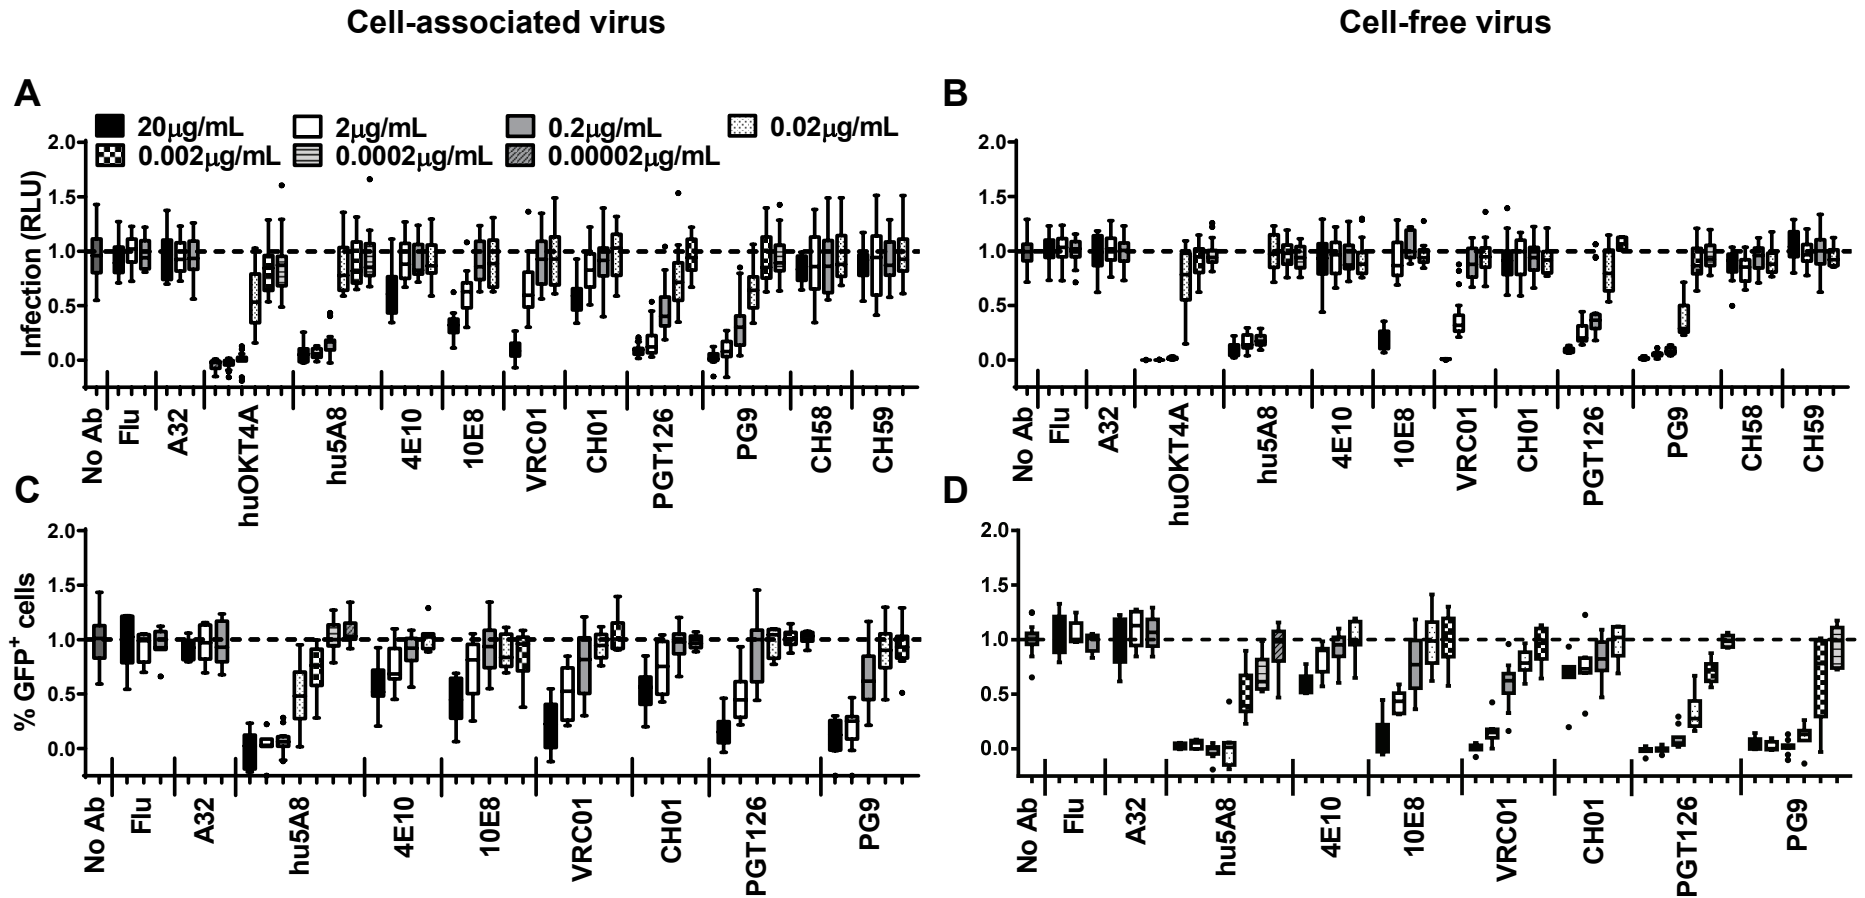

**Figure S2D: Infection with cell-associated or cell-free virus ± DEAE-dextran (10µg/mL) with different antibodies.** Infection of TZM-bl (A,B) or A3R5 (C,D) target cells by cell-associated (A,C) or cell-free (B,D) CH077 virus was carried out in the presence of different concentrations (20-0.00002µg/mL) of antibodies including anti-Flu, A32, 4E10, 10E8, VRC01, CH01, PGT126, PG9, CH58, CH59, and the CD4-directed antibodies hu5A8 and huOKT4A. Background was subtracted, and results were normalized to the no antibody positive control and summarized as infection based on quantification of RLU (A,B) or percentage of GFP<sup>+</sup> (Far Red<sup>-</sup>) cells (C,D). Results are expressed as box-and-whisker plots illustrating the median, first and third quartiles, and range with outliers (circles).

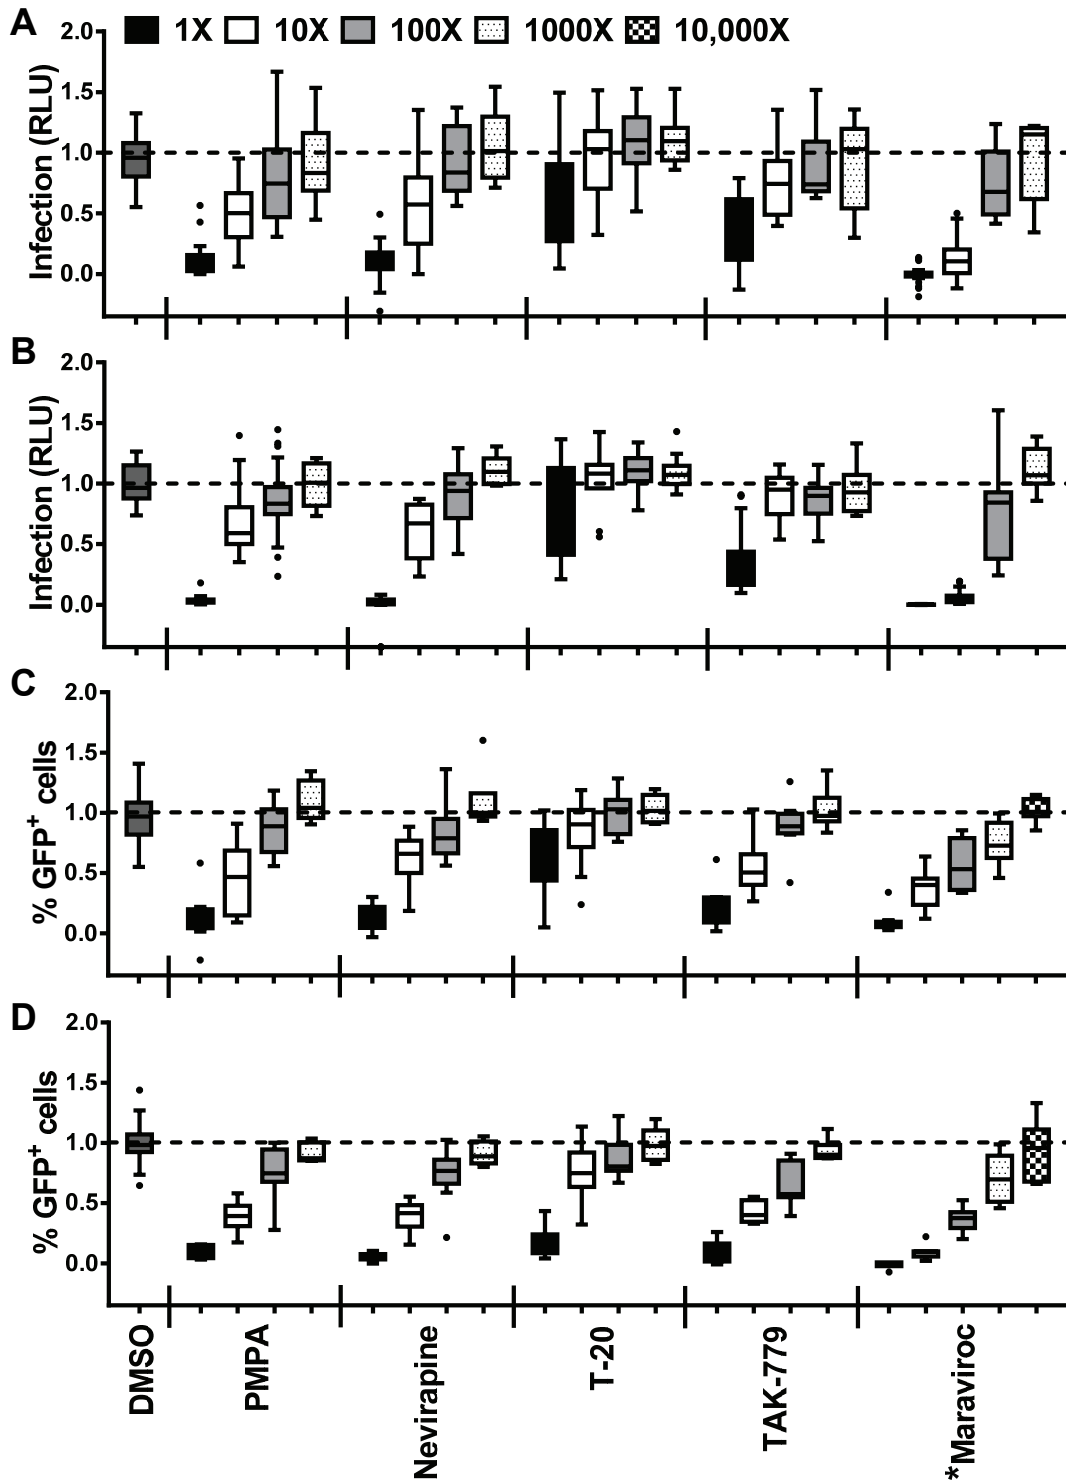

**Figure S3A: Infection with cell-associated or cell-free WITO ± DEAE-dextran with different inhibitors.** TZM-bl (A,B) or A3R5 (C,D) target cells were infected by cell-associated (A,C) or cell-free (B,D) WITO virus in the presence of different concentrations of inhibitors. All inhibitors were serially diluted 10-fold at varying ranges of concentration (PMPA: 10-10000nM, nevirapine: 0.4-400nM, T-20: 0.5-500nM, TAK-779: 1-1000nM), with the exception of maraviroc which was serially diluted 20-fold (\*; 0.015625-2500nM). Background was subtracted from results, and results were normalized to the DMSO positive control and summarized as infection based on RLU (A,B) or percentage of GFP<sup>+</sup> (Far Red<sup>-</sup>) cells (C,D) where 1 is equal to 100 percent infection. Results are expressed as box-and-whisker plots illustrating the median, first and third quartiles, and range with outliers (circles).

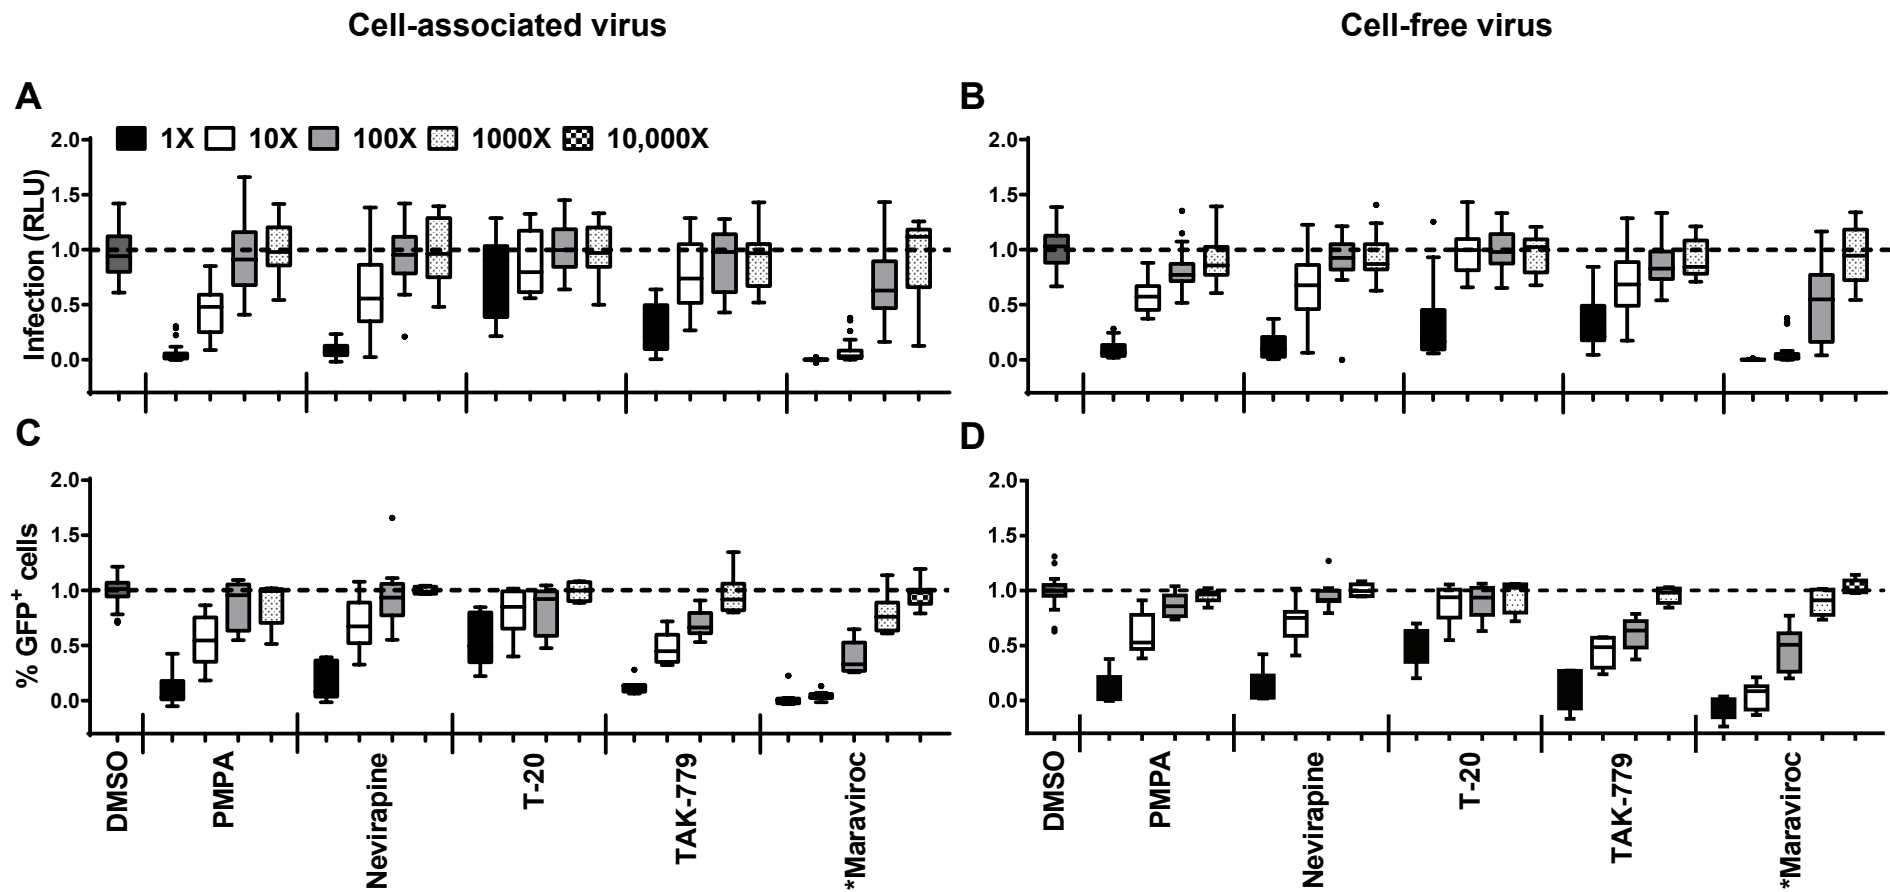

**Figure S3B: Infection with cell-associated or cell-free virus ± DEAE-dextran (10µg/mL) with different inhibitors.** Infection of TZM-bl (A,B) or A3R5 (C,D) target cells by cell-associated (A,C) or cell-free (B,D) BAL virus was carried out in the presence of different concentrations of inhibitors. All inhibitors were serially diluted 10-fold at varying ranges of concentration (PMPA: 0.1-100µM, nevirapine: 0.4-400nM, T-20: 0.5-500nM, TAK-779: 1-1000nM) with the exception of maraviroc, which was serially diluted 20-fold (\*; 0.015625-2500nM). Background was subtracted, and results were normalized to the DMSO positive control and summarized as infection based on quantification of RLU (A,B) or percentage of GFP<sup>+</sup> (Far Red<sup>+</sup>) cells (C,D). Results are expressed as box-and-whisker plots illustrating the median, first and third quartiles, and range with outliers (circles).

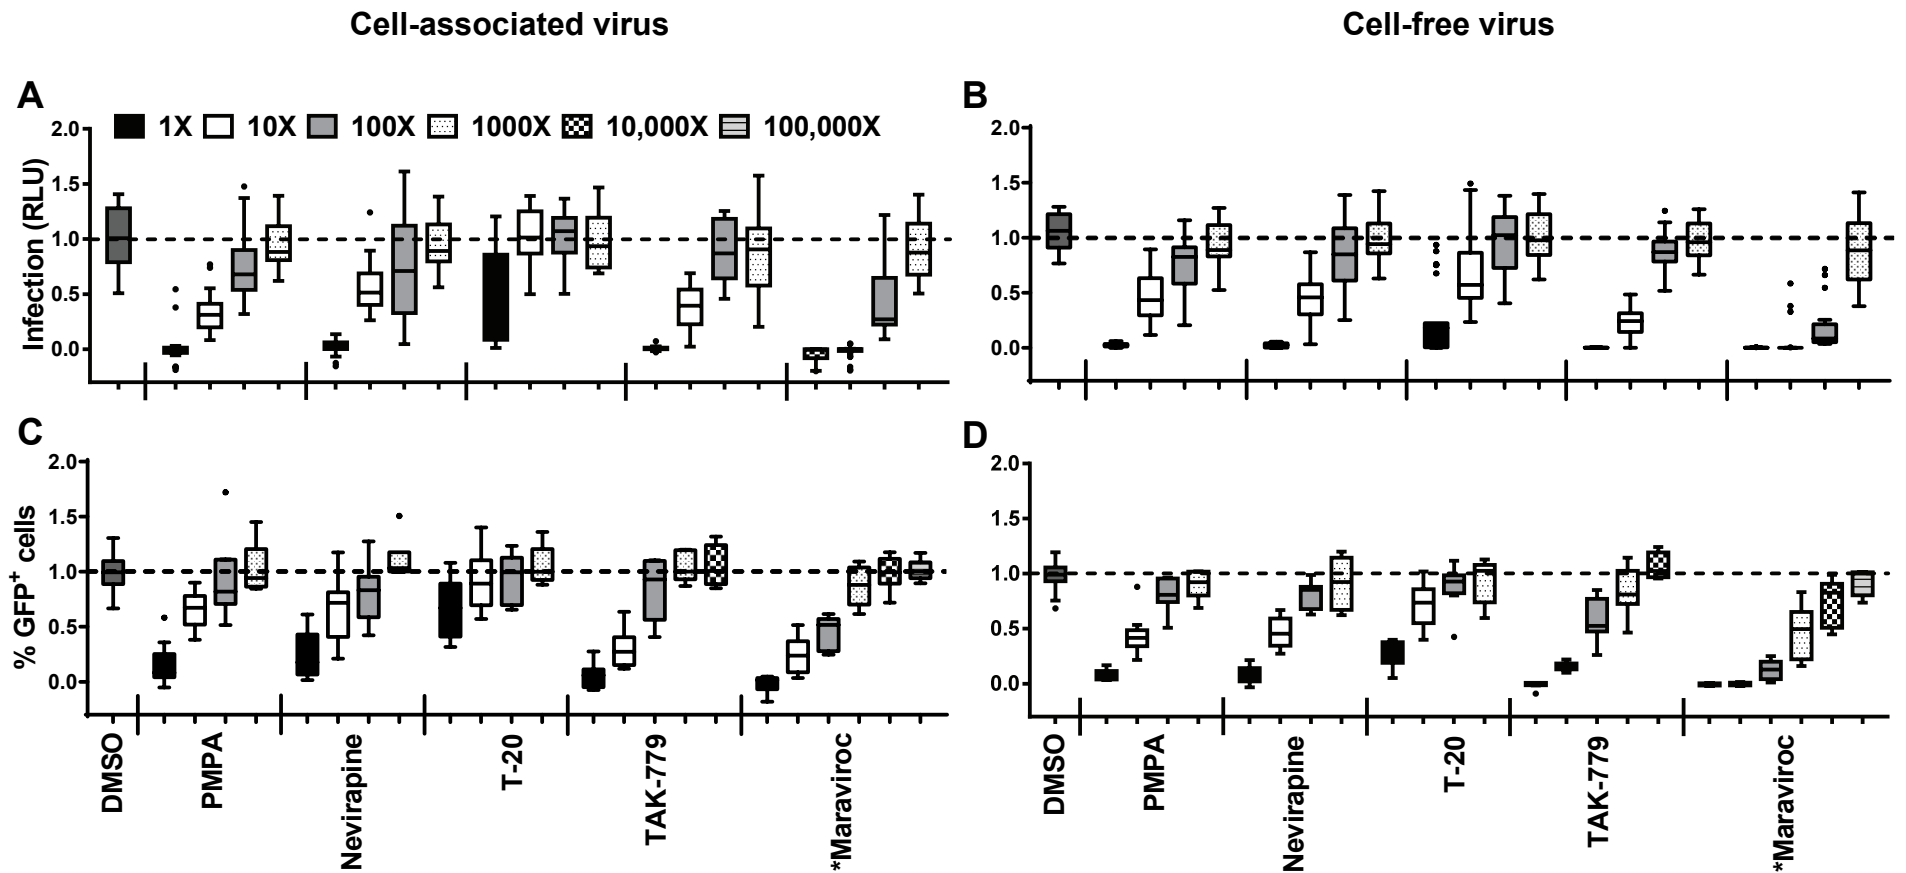

**Figure S3C: Infection with cell-associated or cell-free virus  $\pm$  DEAE-dextran (10 $\mu$ g/mL) with different inhibitors.** Infection of TZM-bl (A,B) or A3R5 (C,D) target cells by cell-associated (A,C) or cell-free (B,D) CH040 virus was carried out in the presence of different concentrations of inhibitors. All inhibitors were serially diluted 10-fold at varying ranges of concentration (PMPA: 0.1-100 $\mu$ M, nevirapine: 0.4-400nM, T-20: 0.5-500nM, TAK-779: 0.1-1000nM) with the exception of maraviroc, which was serially diluted 20-fold (\*; 0.00078125-2500nM). Background was subtracted, and results were normalized to the DMSO positive control and summarized as infection based on quantification of RLU (A,B) or percentage of GFP<sup>+</sup> (Far Red<sup>-</sup>) cells (C,D). Results are expressed as box-and-whisker plots illustrating the median, first and third quartiles, and range with outliers (circles).



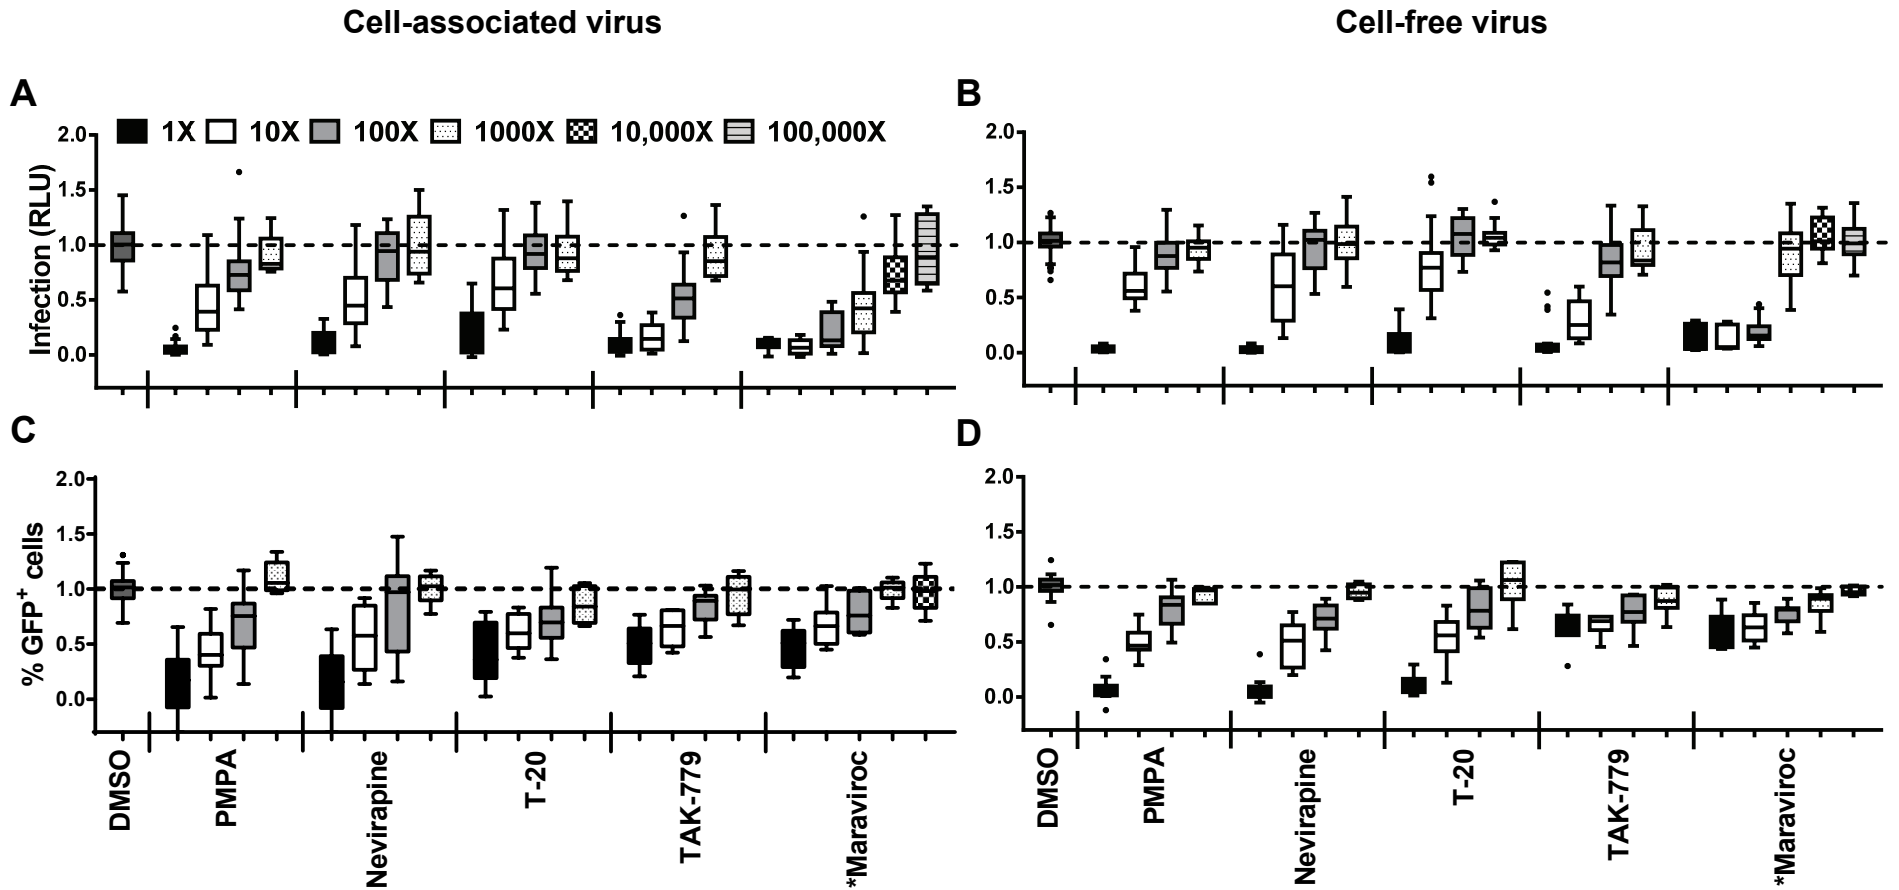

**Figure S3D: Infection with cell-associated or cell-free virus ± DEAE-dextran (10µg/mL) with different inhibitors.** Infection of TZM-bl (A,B) or A3R5 (C,D) target cells by cell-associated (A,C) or cell-free (B,D) CH077 virus was carried out in the presence of different concentrations of inhibitors. All inhibitors were serially diluted 10-fold at varying ranges of concentration (PMPA: 0.1-100µM, nevirapine: 0.4-400nM, T-20: 0.5-500nM, TAK-779: 1-1000nM) with the exception of maraviroc, which was serially diluted 20-fold (\*; 0.00078125-2500nM). Background was subtracted, and results were normalized to the DMSO positive control and summarized as infection based on quantification of RLU (A,B) or percentage of GFP<sup>+</sup> (Far Red<sup>-</sup>) cells (C,D). Results are expressed as box-and-whisker plots illustrating the median, first and third quartiles, and range with outliers (circles).

**A**

| HIV-1 Antibody | Target             |
|----------------|--------------------|
| A32            | gp120 (binding)    |
| huOKT4A        | CD4 domain 1       |
| hu5A8          | CD4 domain 2       |
| 4E10           | gp41 MPER          |
| 10E8           | gp41 MPER          |
| VRC01          | gp120 CD4bs        |
| CH01           | gp120 V2/V3        |
| PGT126         | gp120 V3 glycan    |
| PG9            | gp120 V1/V2        |
| CH58/CH59      | gp120 V2 (binding) |

**B**

| HIV-1 Inhibitor | Target                      |
|-----------------|-----------------------------|
| PMPA            | Nucleotide RT inhibitor     |
| Nevirapine      | Non-nucleoside RT inhibitor |
| T-20            | gp41 fusion inhibitor       |
| TAK-779         | gp120bs on CCR5             |
| Maraviroc       | CCR5 entry inhibitor        |

**Table S1: Specificities of HIV-1 antibodies (A) and inhibitors (B) used.** Each antibody or inhibitor has a unique target site which is either HIV-1-directed or target cell-directed. Most antibodies were neutralizing except for the binding antibodies A32 and CH58/CH59. The anti-flu Ab82 antibody was used as a negative control. Each antibody/inhibitor was pre-incubated with either cell-associated/cell-free HIV-1 or the target cells in both assays based on the target site of each antibody/inhibitor.

| Env variant/<br>assay | Neutralizing antibodies |                       |                       |                        |                        |                       | CD4-directed<br>antibodies |                       | Inhibitors            |                       |                       |                       |                       |
|-----------------------|-------------------------|-----------------------|-----------------------|------------------------|------------------------|-----------------------|----------------------------|-----------------------|-----------------------|-----------------------|-----------------------|-----------------------|-----------------------|
|                       | 10E8                    | 4E10                  | VRC01                 | PGT126                 | PG9                    | CH01                  | hu5A8                      | huOKT4A               | PMPA                  | Nevirapine            | TAK-779               | Maraviroc             | T-20                  |
| BAL A3R5              | 6.79x10 <sup>-2</sup>   | 2.79x10 <sup>-1</sup> | 6.52x10 <sup>-2</sup> | 2.68x10 <sup>-3</sup>  | 5.08x10 <sup>-1</sup>  | 3.32x10 <sup>-1</sup> | 1.29x10 <sup>-1</sup>      |                       | 9.75x10 <sup>-1</sup> | 7.69x10 <sup>-1</sup> | 3.88x10 <sup>-1</sup> | 8.53x10 <sup>-1</sup> | 8.19x10 <sup>-1</sup> |
| BAL TZM-bi            | 1.75x10 <sup>-1</sup>   | 8.94x10 <sup>-3</sup> | 2.03x10 <sup>-7</sup> | 2.43x10 <sup>-1</sup>  | 1.90x10 <sup>-1</sup>  | 2.91x10 <sup>-1</sup> | 3.62x10 <sup>-2</sup>      | 5.79x10 <sup>-2</sup> | 6.97x10 <sup>-2</sup> | 9.72x10 <sup>-1</sup> | 9.22x10 <sup>-1</sup> | 1.24x10 <sup>-1</sup> | 6.25x10 <sup>-2</sup> |
| CH040 A3R5            | 4.59x10 <sup>-3</sup>   | 6.67x10 <sup>-1</sup> | 4.09x10 <sup>-5</sup> | 9.18x10 <sup>-4</sup>  | 9.05x10 <sup>-1</sup>  | 5.03x10 <sup>-1</sup> | 6.56x10 <sup>-4</sup>      |                       | 2.41x10 <sup>-1</sup> | 1.99x10 <sup>-2</sup> | 1.58x10 <sup>-3</sup> | 4.76x10 <sup>-4</sup> | 3.44x10 <sup>-2</sup> |
| CH040 TZM-bi          | 7.35x10 <sup>-1</sup>   | 3.58x10 <sup>-2</sup> | 1.10x10 <sup>-3</sup> | 3.14x10 <sup>-2</sup>  | 4.70x10 <sup>-1</sup>  | 1.74x10 <sup>-1</sup> | 6.68x10 <sup>-1</sup>      | 9.09x10 <sup>-1</sup> | 6.18x10 <sup>-3</sup> | 9.88x10 <sup>-1</sup> | 1.54x10 <sup>-2</sup> | 2.50x10 <sup>-2</sup> | 1.30x10 <sup>-4</sup> |
| CH077 A3R5            | 4.56x10 <sup>-1</sup>   | 4.26x10 <sup>-1</sup> | 3.42x10 <sup>-4</sup> | 5.85x10 <sup>-11</sup> | 6.17x10 <sup>-5</sup>  | 2.69x10 <sup>-1</sup> | 9.26x10 <sup>-6</sup>      |                       | 5.17x10 <sup>-1</sup> | 5.07x10 <sup>-1</sup> | 5.88x10 <sup>-1</sup> | 5.29x10 <sup>-1</sup> | 4.49x10 <sup>-1</sup> |
| CH077 TZM-bi          | 5.72x10 <sup>-1</sup>   | 1.41x10 <sup>-2</sup> | 1.32x10 <sup>-3</sup> | 3.98x10 <sup>-2</sup>  | 1.74x10 <sup>-6</sup>  | 3.40x10 <sup>-3</sup> | 8.15x10 <sup>-5</sup>      | 2.83x10 <sup>-3</sup> | 3.03x10 <sup>-1</sup> | 8.87x10 <sup>-2</sup> | 4.12x10 <sup>-3</sup> | 3.82x10 <sup>-8</sup> | 5.62x10 <sup>-1</sup> |
| WITO A3R5             | 8.46x10 <sup>-1</sup>   | 1.78x10 <sup>-1</sup> | 5.97x10 <sup>-9</sup> | 2.26x10 <sup>-3</sup>  | 2.93x10 <sup>-7</sup>  | 4.76x10 <sup>-6</sup> | 3.89x10 <sup>-6</sup>      |                       | 3.85x10 <sup>-1</sup> | 8.83x10 <sup>-4</sup> | 9.01x10 <sup>-3</sup> | 9.86x10 <sup>-5</sup> | 7.31x10 <sup>-3</sup> |
| WITO TZM-bi           | 5.67x10 <sup>-1</sup>   | 2.72x10 <sup>-1</sup> | 4.86x10 <sup>-7</sup> | 1.21x10 <sup>-3</sup>  | 2.06x10 <sup>-16</sup> | 2.46x10 <sup>-6</sup> | 1.75x10 <sup>-3</sup>      | 1.10x10 <sup>-4</sup> | 3.42x10 <sup>-1</sup> | 8.99x10 <sup>-2</sup> | 4.43x10 <sup>-1</sup> | 4.53x10 <sup>-1</sup> | 2.37x10 <sup>-1</sup> |

**Table S2: Comparison of cell-associated and cell-free virus neutralization.** The values inside each box are the p values from the stratified exact Wilcoxon sign rank test. Red p values are significant after using Holm's adjustment and blue p values represent tests that had p<0.05 but which were not significant after Holm's adjustment. Directional trends are represented such that a gray background illustrates that cell-free virus is more neutralized than cell-associated virus and a green background means that cell-free virus is less neutralized than cell-associated virus. Of the 100 comparisons performed, the difference in neutralization of cell-associated versus cell-free virus was significant in 40 percent of total comparisons for the Wilcoxon statistical analyses. Boxes that remain blank represent antibodies that were not used in the assay.

**A**

| Cell-associated:cell-free IC50 ratio |       |       |       |       |
|--------------------------------------|-------|-------|-------|-------|
| Antibody/<br>inhibitor               | BAL   | WITO  | CH040 | CH077 |
| huOKT4A                              | 0.6   | 0.5   | 0.8   | 0.9   |
| hu5A8                                | N/A   | 3.6*  | 0.97  | 0.6   |
| 10E8                                 | 0.55  | 1.1   | 0.8   | 0.7   |
| VRC01                                | 3.0*  | 5.1*  | 1.9*  | 2.6*  |
| PGT126                               | 15.1* | N/A   | N/A   | 1.8   |
| PG9                                  | N/A   | 31.6* | N/A   | 4.5*  |
| PMPA                                 | 0.4   | 0.6   | 0.4   | 0.7   |
| Nevirapine                           | 0.8   | 0.7   | 1.9   | 0.8   |
| T-20                                 | N/A   | N/A   | 1.8   | 0.9   |
| TAK-779                              | 0.6   | 0.7   | 1.8   | 0.2*  |
| Maraviroc                            | 2.3   | 1.7   | 4.1*  | 0.06* |

**B**

| Cell-associated:cell-free IC50 ratio |      |       |       |        |
|--------------------------------------|------|-------|-------|--------|
| Antibody/<br>inhibitor               | BAL  | WITO  | CH040 | CH077  |
| hu5A8                                | N/A  | 13.7* | 9.9*  | 6.6*   |
| 4E10                                 | 1.0  | 1.4   | N/A   | 0.2    |
| 10E8                                 | 0.8  | 2.2   | 0.4   | 2.8    |
| VRC01                                | 4.1* | 10.1* | 6.5*  | 8.3*   |
| CH01                                 | N/A  | 8.6*  | N/A   | 5.6    |
| PGT126                               | 2.5* | 1.6   | N/A   | 273.5* |
| PG9                                  | N/A  | 15.1* | N/A   | 103.7* |
| PMPA                                 | 0.8  | 0.8   | 1.6   | 0.4    |
| Nevirapine                           | 0.97 | 1.9   | 1.1   | 1.2    |
| T-20                                 | 1.1  | 0.73  | 1.0   | 0.3    |
| TAK-779                              | 1.5  | 2.2   | 2.7   | 0.7    |
| Maraviroc                            | 0.2  | 8.0*  | 19.9* | 0.6    |

**Table S3: Cell-associated to cell-free virus neutralization relative IC50 ratios.** The ratios were calculated from the relative IC50s listed in Table 2 for both the TZM-bl (**A**) and A3R5 (**B**) assay. Ratios significantly greater than 1 represent reduced neutralization efficiency of the specific antibody or inhibitor on cell-associated virus compared to cell-free virus. Significant differences between the logIC50s for the cell-associated and cell-free Env variants were assessed and adjusted by Holm's method for multiple comparisons, and are represented with an \*.

A

| Same factors |        | Factor that differs | Ab with greater neut. > ab with less neut. | p value            | Factor that differs | Ab with greater neut. > ab with less neut. | p value            |
|--------------|--------|---------------------|--------------------------------------------|--------------------|---------------------|--------------------------------------------|--------------------|
| <b>CA</b>    | CH040  | A3R5                | 10E8>VRC01                                 | $1 \times 10^{-3}$ | TZM-bl              | VRC01>10E8                                 | $1 \times 10^{-5}$ |
| <b>CA</b>    | WITO   | A3R5                | CH01>PGT126                                | $1 \times 10^{-5}$ | TZM-bl              | PGT126>CH01                                | $1 \times 10^{-5}$ |
| <b>CF</b>    | CH040  | A3R5                | PGT126>PG9                                 | $7 \times 10^{-3}$ | TZM-bl              | PG9>PGT126                                 | $6 \times 10^{-4}$ |
| <b>CH040</b> | A3R5   | CA                  | 10E8>VRC01                                 | $1 \times 10^{-3}$ | CF                  | VRC01>10E8                                 | $2 \times 10^{-3}$ |
| <b>BAL</b>   | TZM-bl | CA                  | huOKT4A>VRC01                              | $1 \times 10^{-5}$ | CF                  | VRC01>huOKT4A                              | $1 \times 10^{-5}$ |
| <b>WITO</b>  | TZM-bl | CA                  | PGT126>4E10                                | $1 \times 10^{-5}$ | CF                  | 4E10>PGT126                                | $1 \times 10^{-5}$ |

**Table S4A: Differences in antibody neutralization efficiencies (neut.) with experimental conditions.** Pairs of compared antibodies with significantly different neutralization efficiencies based on assay type or cell-associated (CA) versus cell-free (CF) virus. A stratified exact Wilcoxon rank sum test was performed for all possible comparisons of 2 of the 8 antibodies. Significant p values were determined after Holm's adjustment for all the antibody comparisons from the same experimental conditions. > indicates that the antibody to the left has a significantly greater neutralization efficiency than the antibody to the right.

**B**

| CA or CF virus | Assay  | Env variant (factor that differs) | Ab with greater neut. > ab with less neut. | p value             | Env variant (factor that differs) | Ab with greater neut. > ab with less neut. | p value             |       |              |                     |
|----------------|--------|-----------------------------------|--------------------------------------------|---------------------|-----------------------------------|--------------------------------------------|---------------------|-------|--------------|---------------------|
| CA             | TZM-bl | BAL                               | VRC01>PGT126                               | 6x10 <sup>-15</sup> | CH077                             | PGT126>VRC01                               | 2x10 <sup>-13</sup> |       |              |                     |
|                |        | CH040                             |                                            | 5x10 <sup>-10</sup> |                                   |                                            |                     |       |              |                     |
|                |        | WITO                              |                                            | 7x10 <sup>-3</sup>  |                                   |                                            |                     |       |              |                     |
| CA             | TZM-bl | BAL                               | VRC01>PG9                                  | 1x10 <sup>-23</sup> | CH077                             | PG9>VRC01                                  | 5x10 <sup>-20</sup> |       |              |                     |
|                |        | CH040                             | VRC01>PG9                                  | 2x10 <sup>-9</sup>  |                                   |                                            |                     | WITO  | PG9>VRC01    | 2x10 <sup>-22</sup> |
|                |        |                                   |                                            |                     |                                   |                                            |                     |       |              |                     |
| CA             | TZM-bl | BAL                               | VRC01>hu5A8                                | 3x10 <sup>-26</sup> | CH077                             | hu5A8>VRC01                                | 6x10 <sup>-14</sup> |       |              |                     |
|                |        |                                   |                                            |                     |                                   |                                            |                     | WITO  | hu5A8>VRC01  | 9x10 <sup>-10</sup> |
|                |        |                                   |                                            |                     |                                   |                                            |                     |       |              |                     |
| CA             | TZM-bl | BAL                               | PGT126>PG9                                 | 2x10 <sup>-13</sup> | CH077                             | PG9>PGT126                                 | 5x10 <sup>-6</sup>  |       |              |                     |
|                |        |                                   |                                            |                     |                                   |                                            |                     | WITO  | PG9>PGT126   | 2x10 <sup>-21</sup> |
|                |        |                                   |                                            |                     |                                   |                                            |                     |       |              |                     |
| CA             | TZM-bl | BAL                               | PGT126>hu5A8                               | 6x10 <sup>-15</sup> | CH040                             | hu5A8>PGT126                               | 1x10 <sup>-14</sup> |       |              |                     |
|                |        |                                   |                                            |                     |                                   |                                            |                     | CH077 | hu5A8>PGT126 | 8x10 <sup>-6</sup>  |
|                |        |                                   |                                            |                     |                                   |                                            |                     | WITO  | hu5A8>PGT126 | 8x10 <sup>-12</sup> |
| CA             | TZM-bl | BAL                               | 10E8>PG9                                   | 6x10 <sup>-8</sup>  | CH077                             | PG9>10E8                                   | 7x10 <sup>-25</sup> |       |              |                     |
| CA             | TZM-bl | BAL                               | 10E8>hu5A8                                 | 5x10 <sup>-9</sup>  | CH040                             | hu5a8>10E8                                 | 9x10 <sup>-12</sup> |       |              |                     |
|                |        |                                   |                                            |                     | CH077                             | hu5a8>10E8                                 | 4x10 <sup>-22</sup> |       |              |                     |
|                |        |                                   |                                            |                     | WITO                              | hu5a8>10E8                                 | 4x10 <sup>-10</sup> |       |              |                     |
| CF             | TZM-bl | BAL                               | VRC01>hu0KT4a                              | 2x10 <sup>-8</sup>  | CH040                             | hu0KT4a>VRC01                              | 2x10 <sup>-19</sup> |       |              |                     |
|                |        |                                   |                                            |                     | CH077                             | hu0KT4a>VRC01                              | 3x10 <sup>-18</sup> |       |              |                     |
|                |        |                                   |                                            |                     | WITO                              | hu0KT4a>VRC01                              | 3x10 <sup>-32</sup> |       |              |                     |
| CF             | TZM-bl | BAL                               | VRC01>PGT126                               | 3x10 <sup>-31</sup> | CH077                             | PGT126>VRC01                               | 4x10 <sup>-5</sup>  |       |              |                     |
|                |        |                                   |                                            |                     | CH040                             | VRC01>PGT126                               | 1x10 <sup>-14</sup> |       |              |                     |
|                |        |                                   |                                            |                     | WITO                              | VRC01>PGT126                               | 2x10 <sup>-18</sup> |       |              |                     |
| CF             | TZM-bl | BAL                               | VRC01>PG9                                  | 4x10 <sup>-30</sup> | CH077                             | PG9>VRC01                                  | 2x10 <sup>-25</sup> |       |              |                     |
|                |        |                                   |                                            |                     | CH040                             | VRC01>PG9                                  | 1x10 <sup>-11</sup> |       |              |                     |
|                |        |                                   |                                            |                     |                                   |                                            |                     |       |              |                     |
| CF             | TZM-bl | BAL                               | VRC01>hu5A8                                | 1x10 <sup>-31</sup> | CH077                             | hu5A8>VRC01                                | 2x10 <sup>-5</sup>  |       |              |                     |
|                |        |                                   |                                            |                     |                                   |                                            |                     | WITO  | hu5A8>VRC01  | 5x10 <sup>-11</sup> |
|                |        |                                   |                                            |                     |                                   |                                            |                     |       |              |                     |
| CF             | TZM-bl | BAL                               | PGT126>10E8                                | 7x10 <sup>-10</sup> | WITO                              | 10E8>PGT126                                | 1x10 <sup>-2</sup>  |       |              |                     |
|                |        |                                   |                                            |                     | CH077                             | PGT126>10E8                                | 2x10 <sup>-19</sup> |       |              |                     |
|                |        |                                   |                                            |                     |                                   |                                            |                     |       |              |                     |
| CF             | TZM-bl | BAL                               | PGT126>4E10                                | 4x10 <sup>-21</sup> | WITO                              | 4E10>PGT126                                | 1x10 <sup>-3</sup>  |       |              |                     |
|                |        |                                   |                                            |                     | CH077                             | PGT126>4E10                                | 7x10 <sup>-25</sup> |       |              |                     |
|                |        |                                   |                                            |                     |                                   |                                            |                     |       |              |                     |
| CF             | TZM-bl | BAL                               | PGT126>PG9                                 | 4x10 <sup>-24</sup> | CH040                             | PG9>PGT126                                 | 6x10 <sup>-4</sup>  |       |              |                     |
|                |        |                                   |                                            |                     | CH077                             | PG9>PGT126                                 | 5x10 <sup>-39</sup> |       |              |                     |
|                |        |                                   |                                            |                     | WITO                              | PG9>PGT126                                 | 3x10 <sup>-51</sup> |       |              |                     |
| CF             | TZM-bl | BAL                               | PGT126>hu5A8                               | 9x10 <sup>-20</sup> | CH040                             | hu5A8>PGT126                               | 3x10 <sup>-16</sup> |       |              |                     |
|                |        |                                   |                                            |                     | CH077                             | hu5A8>PGT126                               | 3x10 <sup>-3</sup>  |       |              |                     |
|                |        |                                   |                                            |                     | WITO                              | hu5A8>PGT126                               | 5x10 <sup>-18</sup> |       |              |                     |
| CF             | TZM-bl | BAL                               | PGT126>CH01                                | 4x10 <sup>-25</sup> | WITO                              | CH01>PGT126                                | 3x10 <sup>-8</sup>  |       |              |                     |
|                |        |                                   |                                            |                     | CH077                             | PGT126>CH01                                | 9x10 <sup>-25</sup> |       |              |                     |
|                |        |                                   |                                            |                     |                                   |                                            |                     |       |              |                     |
| CF             | TZM-bl | BAL                               | 10E8>PG9                                   | 1x10 <sup>-13</sup> | CH077                             | PG9>10E8                                   | 1x10 <sup>-35</sup> |       |              |                     |
|                |        |                                   |                                            |                     |                                   |                                            |                     | WITO  | PG9>10E8     | 6x10 <sup>-52</sup> |
|                |        |                                   |                                            |                     |                                   |                                            |                     |       |              |                     |
| CF             | TZM-bl | BAL                               | 4E10>PG9                                   | 9x10 <sup>-7</sup>  | CH077                             | PG9>4E10                                   | 2x10 <sup>-45</sup> |       |              |                     |
|                |        |                                   |                                            |                     |                                   |                                            |                     | WITO  | PG9>4E10     | 5x10 <sup>-49</sup> |
|                |        |                                   |                                            |                     |                                   |                                            |                     |       |              |                     |
| CF             | TZM-bl | CH040                             | hu5A8>PG9                                  | 1x10 <sup>-13</sup> | CH077                             | PG9>hu5A8                                  | 6x10 <sup>-16</sup> |       |              |                     |
|                |        | BAL                               | hu5A8>PG9                                  | 1x10 <sup>-2</sup>  |                                   |                                            |                     | WITO  | PG9>hu5A8    | 9x10 <sup>-27</sup> |

**Table S4B: Differences in antibody neutralization efficiencies (neut.) with experimental conditions.** Pairs of compared antibodies with significantly different neutralization efficiencies based on the cell-associated (CA) versus cell-free (CF) Env variant in the TZM-bl assay. A stratified exact Wilcoxon rank sum test was performed for all possible comparisons of 2 of the 8 antibodies. Significant p values were determined after Holm's adjustment for all the antibody comparisons from the same experimental conditions. > indicates that the antibody to the left has a significantly greater neutralization efficiency than the antibody to the right.

C

| CA or CF virus | Assay | Env variant (factor that differs) | Ab with greater neut. > ab with less neut. | p value              | Env variant (factor that differs) | Ab with greater neut. > ab with less neut. | p value             |
|----------------|-------|-----------------------------------|--------------------------------------------|----------------------|-----------------------------------|--------------------------------------------|---------------------|
| CA             | A3R5  | BAL                               | VRC01>10E8                                 | 1x10 <sup>-5</sup>   | CH040                             | 10E8>VRC01                                 | 1x10 <sup>-5</sup>  |
| CA             | A3R5  | BAL                               | PGT126>10E8                                | 2x10 <sup>-5</sup>   | CH040                             | 10E8>PGT126                                | 6x10 <sup>-8</sup>  |
|                |       |                                   |                                            |                      | WITO                              | 10E8>PGT126                                | 5x10 <sup>-4</sup>  |
| CA             | A3R5  | BAL                               | VRC01>hu5A8                                | 1.5x10 <sup>-8</sup> | CH040                             | hu5A8>VRC01                                | 1x10 <sup>-8</sup>  |
|                |       |                                   |                                            |                      | CH077                             | hu5A8>VRC01                                | 7x10 <sup>-11</sup> |
|                |       |                                   |                                            |                      | WITO                              | hu5A8>VRC01                                | 2x10 <sup>-12</sup> |
| CA             | A3R5  | BAL                               | VRC01>PG9                                  | 2x10 <sup>-10</sup>  | CH040                             | PG9>VRC01                                  | 5x10 <sup>-9</sup>  |
|                |       |                                   |                                            |                      | CH077                             | PG9>VRC01                                  | 4x10 <sup>-3</sup>  |
|                |       |                                   |                                            |                      | WITO                              | PG9>VRC01                                  | 1x10 <sup>-8</sup>  |
| CA             | A3R5  | BAL                               | PGT126>hu5A8                               | 5x10 <sup>-9</sup>   | CH040                             | hu5A8>PGT126                               | 4x10 <sup>-13</sup> |
|                |       |                                   |                                            |                      | CH077                             | hu5A8>PGT126                               | 2x10 <sup>-11</sup> |
|                |       |                                   |                                            |                      | WITO                              | hu5A8>PGT126                               | 2x10 <sup>-15</sup> |
| CA             | A3R5  | BAL                               | PGT126>CH01                                | 6x10 <sup>-10</sup>  | WITO                              | CH01>PGT126                                | 4x10 <sup>-6</sup>  |
|                |       | CH077                             | PGT126>CH01                                | 4x10 <sup>-3</sup>   |                                   |                                            |                     |
| CA             | A3R5  | BAL                               | PGT126>PG9                                 | 9x10 <sup>-12</sup>  | CH077                             | PG9>PGT126                                 | 4x10 <sup>-4</sup>  |
|                |       |                                   |                                            |                      | WITO                              | PG9>PGT126                                 | 2x10 <sup>-13</sup> |
| CA             | A3R5  | BAL                               | 10E8>hu5A8                                 | 3x10 <sup>-3</sup>   | WITO                              | hu5A8>10E8                                 | 7x10 <sup>-5</sup>  |
| CF             | A3R5  | BAL                               | PGT126>10E8                                | 1x10 <sup>-5</sup>   | CH040                             | 10E8>PGT126                                | 1x10 <sup>-5</sup>  |
|                |       |                                   |                                            |                      | CH077                             | 10E8>PGT126                                | 4x10 <sup>-13</sup> |
|                |       |                                   |                                            |                      | WITO                              | 10E8>PGT126                                | 2x10 <sup>-4</sup>  |
| CF             | A3R5  | BAL                               | PGT126>CH01                                | 2x10 <sup>-10</sup>  | WITO                              | CH01>PGT126                                | 7x10 <sup>-13</sup> |
|                |       | CH077                             | PGT126>CH01                                | 8x10 <sup>-19</sup>  |                                   |                                            |                     |
| CF             | A3R5  | BAL                               | PGT126>hu5A8                               | 3x10 <sup>-11</sup>  | CH040                             | hu5A8>PGT126                               | 2x10 <sup>-16</sup> |
|                |       |                                   |                                            |                      | CH077                             | hu5A8>PGT126                               | 1x10 <sup>-3</sup>  |
|                |       |                                   |                                            |                      | WITO                              | hu5A8>PGT126                               | 1x10 <sup>-19</sup> |
| CF             | A3R5  | BAL                               | PGT126>PG9                                 | 1x10 <sup>-14</sup>  | WITO                              | PG9>PGT126                                 | 3x10 <sup>-23</sup> |
|                |       | CH040                             |                                            | 7x10 <sup>-3</sup>   |                                   |                                            |                     |
| CF             | A3R5  | BAL                               | VRC01>hu5A8                                | 3x10 <sup>-14</sup>  | CH040                             | hu5A8>VRC01                                | 4x10 <sup>-13</sup> |
|                |       |                                   |                                            |                      | CH077                             | hu5A8>VRC01                                | 6x10 <sup>-13</sup> |
|                |       |                                   |                                            |                      | WITO                              | hu5A8>VRC01                                | 9x10 <sup>-14</sup> |
| CF             | A3R5  | BAL                               | VRC01>PG9                                  | 3x10 <sup>-13</sup>  | CH077                             | PG9>VRC01                                  | 7x10 <sup>-9</sup>  |
|                |       | CH040                             | VRC01>PG9                                  | 1x10 <sup>-14</sup>  | WITO                              | PG9>VRC01                                  | 1x10 <sup>-12</sup> |
| CF             | A3R5  | BAL                               | 10E8>PG9                                   | 6x10 <sup>-7</sup>   | CH077                             | PG9>10E8                                   | 3x10 <sup>-10</sup> |
|                |       | CH040                             | 10E8>PG9                                   | 7x10 <sup>-6</sup>   | WITO                              | PG9>10E8                                   | 1x10 <sup>-11</sup> |
| CF             | A3R5  | BAL                               | 4E10>CH01                                  | 7x10 <sup>-4</sup>   | WITO                              | CH01>4E10                                  | 7x10 <sup>-13</sup> |
| CF             | A3R5  | BAL                               | 4E10>PG9                                   | 4x10 <sup>-6</sup>   | CH077                             | PG9>4E10                                   | 5x10 <sup>-18</sup> |
|                |       |                                   |                                            |                      | WITO                              | PG9>4E10                                   | 2x10 <sup>-19</sup> |
| CF             | A3R5  | CH040                             | VRC01>PGT126                               | 8x10 <sup>-17</sup>  | CH077                             | PGT126>VRC01                               | 4x10 <sup>-12</sup> |
|                |       | WITO                              | VRC01>PGT126                               | 5x10 <sup>-16</sup>  |                                   |                                            |                     |

**Table S4C: Differences in antibody neutralization efficiencies (neut.) with experimental conditions.** Pairs of compared antibodies with significantly different neutralization efficiencies based on the cell-associated (CA) versus cell-free (CF) Env variant in the A3R5 assay. A stratified exact Wilcoxon rank sum test was performed for all possible comparisons of 2 of the 8 antibodies. Significant p values were determined after Holm's adjustment for all the antibody comparisons from the same experimental conditions. > indicates that the antibody to the left has a significantly greater neutralization efficiency than the antibody to the right.

D

| Env variant                 | Quantity | Score                       |                             |                            |                            | p value |
|-----------------------------|----------|-----------------------------|-----------------------------|----------------------------|----------------------------|---------|
|                             |          | -2<br>(in minority of<br>3) | -1<br>(in minority of<br>2) | 1<br>(in majority of<br>2) | 2<br>(in majority of<br>3) |         |
| <b>BAL vs.<br/>other 3</b>  | Number   | 11                          | 8                           | 5                          | 2                          | 0.0089  |
|                             | % of 26  | 42%                         | 31%                         | 19%                        | 8%                         |         |
| <b>WITO vs.<br/>other 3</b> | Number   | 0                           | 6                           | 8                          | 13                         | 0.00019 |
|                             | % of 27  | 0%                          | 22%                         | 30%                        | 48%                        |         |

**Table S4D: Differences in antibody neutralization efficiencies (neut.) with experimental conditions.** To explore if the chronic Env variant, BAL, responded differently to neutralizing antibodies than the three T/F HIV-1 Env variants, we examined 32 of the 37 total comparisons that included BAL where there were significant differences in the ordering of a pair of antibodies in Tables S4B and S4C. We calculated how often BAL had the minority or “odd man out” view (versus 2 or 3 of the other viruses, scores of -1 or -2, respectively) compared to the majority view (with 1 or 2 viruses, scores of 1 or 2, respectively), and which antibody had better neutralization efficiency. An exact Wilcoxon sign rank test was performed and determined that BAL was significantly associated with having a minority ordering (42 percent of scores were -2, 31 percent were -1, 19 percent were 1, and 8 percent were 2), and hence a significantly different neutralization response compared to the three T/F Env variants, WITO, CH040, and CH077 (p=0.009).
